# Supplementary material for: Improvement in quantum yield by suppression of trions in room temperature synthesized CsPbBr3 perovskite quantum dots for backlight displays
Source: Royal Society of Chemistry journal article supplement (doi:10.1039/c9nr09056h), 2020-01-01
Supplement: c9nr09056h1.pdf [file c9nr09056h1.pdf]

# Improvement in Quantum Yield by Suppression of Trions in Room Temperature Synthesized CsPbBr<sub>3</sub> Perovskite Quantum Dots for Backlight Display

*Kashyap Dave<sup>a,b</sup>, Zhen Bao<sup>a</sup>, Satoshi Nakahara<sup>c</sup>, Keiichi Ohara<sup>c</sup>, Sojiro Masada<sup>c</sup>, Hirokazu Tahara<sup>c</sup>, Yoshihiko Kanemitsu<sup>c\*</sup>, and Ru-Shi Liu<sup>a,d\*</sup>*

<sup>a</sup>Department of Chemistry and Advanced Research Center of Green Materials Science and Technology, National Taiwan University, Taipei 106, Taiwan.

<sup>b</sup>Nanoscience and Technology Program, Taiwan International Graduate Program, Academia Sinica and National Taiwan University, Taipei 115, Taiwan.

<sup>c</sup>Institute for Chemical Research, Kyoto University, Uji, Kyoto 611-0011, Japan.

<sup>d</sup>Department of Mechanical Engineering and Graduate Institute of Manufacturing Technology, National Taipei University of Technology, Taipei 106, Taiwan.

## Supporting Information

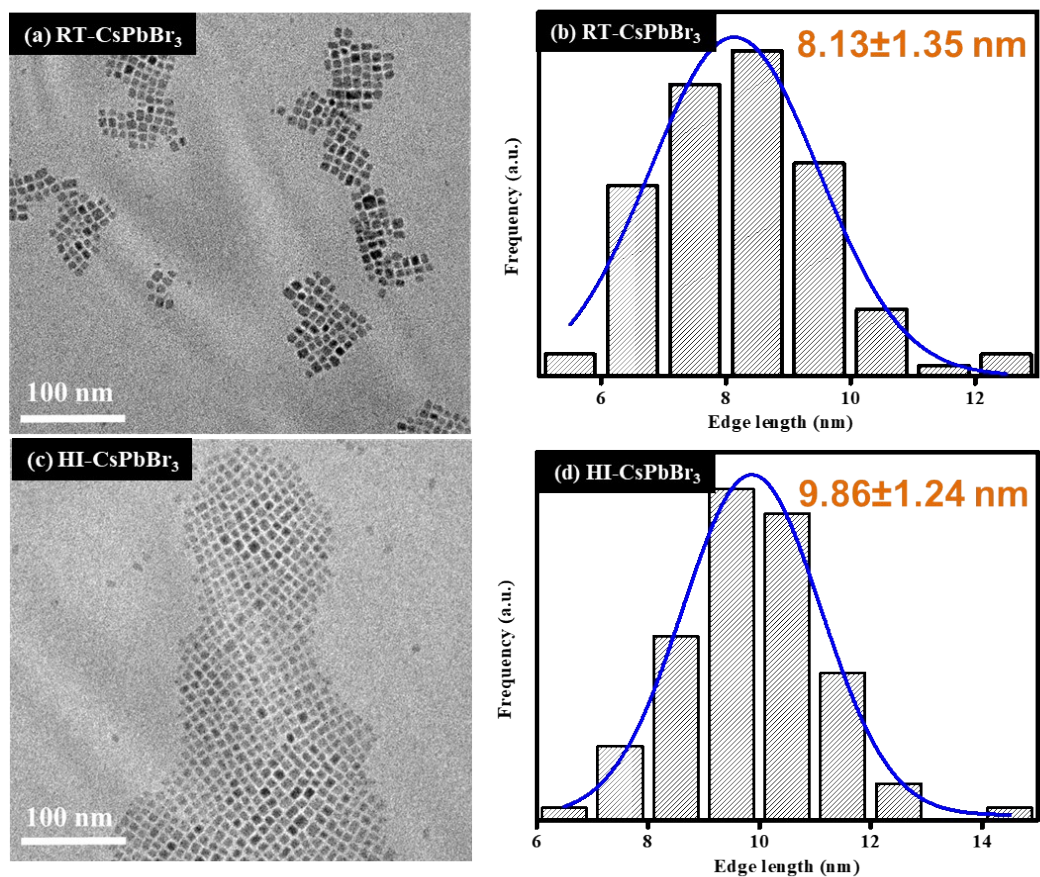

**Figure S1.** Transmission electron microscopy of (a,b) RT-CsPbBr<sub>3</sub> and (c,d) HI-CsPbBr<sub>3</sub> with histogram.

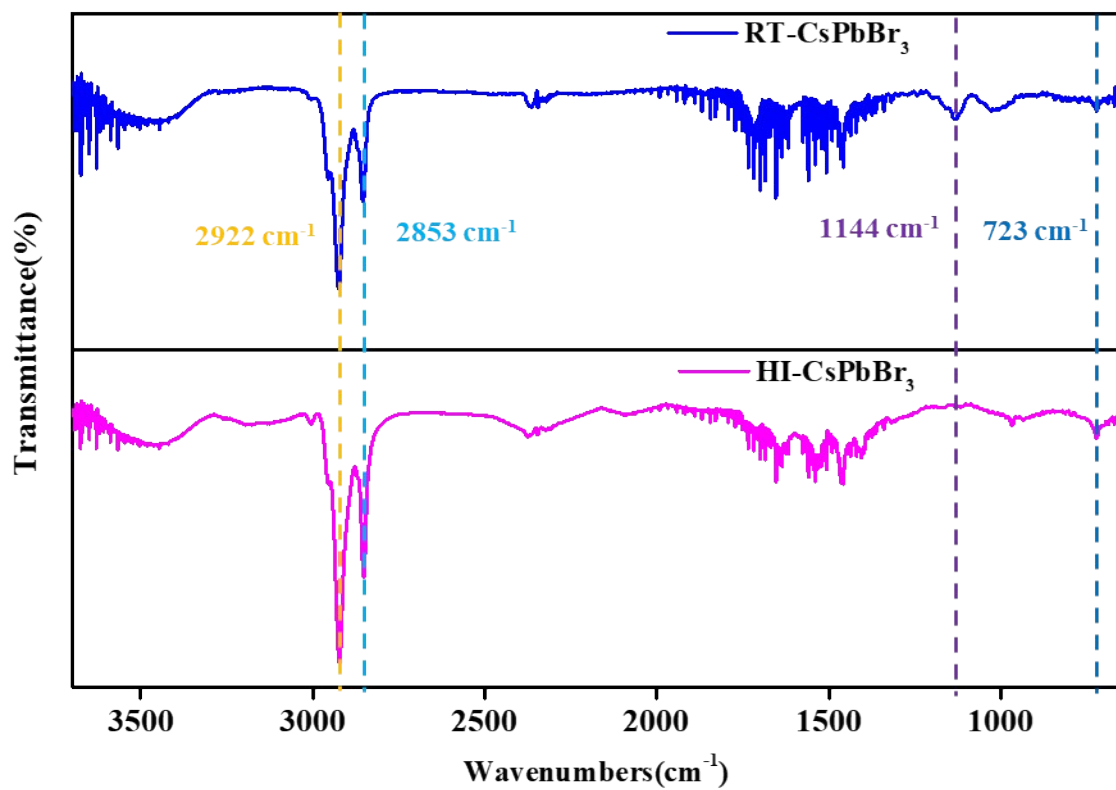

**Figure S2.** Fourier-transform infrared spectroscopy (FTIR) spectrum of RT-CsPbBr<sub>3</sub> and HI-CsPbBr<sub>3</sub> PQDs.

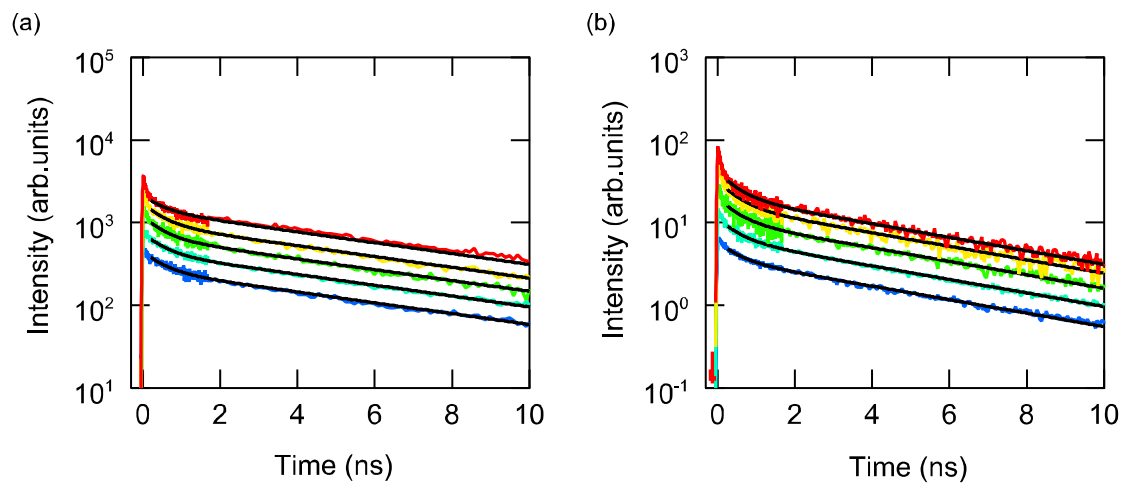

**Figure S3.** Time-resolved PL intensities for (a) RT-CsPbBr<sub>3</sub> and (b) HI-CsPbBr<sub>3</sub> perovskite quantum dot ensembles. The excitation photon fluence was changed from  $3.3 \times 10^{13}$  to  $4.5 \times 10^{14}$  cm<sup>-2</sup>.

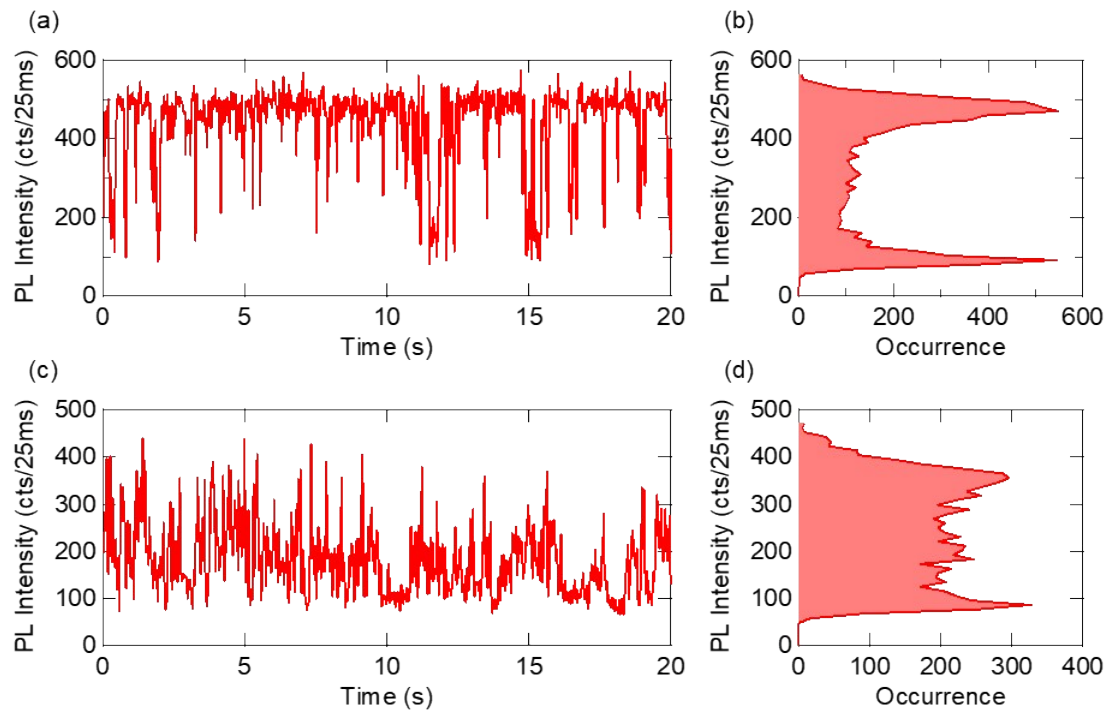

**Figure S4.** Single-dot PL intensity time traces for (a,b) a blinking RT-CsPbBr<sub>3</sub> and (c,d) a flickering RT-CsPbBr<sub>3</sub>. The histograms of the PL intensities are shown in (b) and (d) for a blinking and flickering RT-CsPbBr<sub>3</sub>. The excitation photon fluence is  $9.8 \times 10^{11}$  photons/cm<sup>2</sup>.

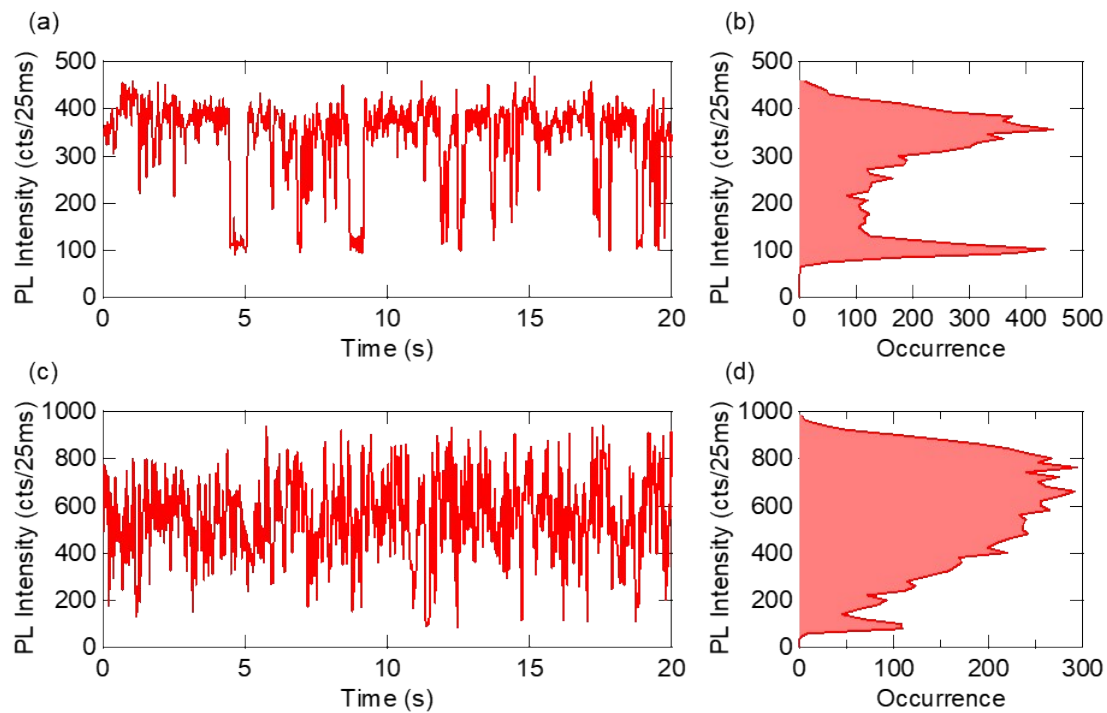

**Figure S5.** Single-dot PL intensity time traces for (a,b) a blinking HI-CspBr<sub>3</sub> and (c,d) a flickering HI-CspBr<sub>3</sub>. The histograms of the PL intensities are shown in (b) and (d) for a blinking and flickering HI-CspBr<sub>3</sub>. The excitation photon fluence is  $9.8 \times 10^{11}$  photons/cm<sup>2</sup>.
